# Supplementary material
Source: Royal Society of Chemistry journal article supplement (doi:10.1039/d5pm00233h)
Supplement: d5pm00233h1.pdf [file d5pm00233h1.pdf]

| Group Comparison (Day 4)                              | Mean diff. | SE of diff. | q     |
|-------------------------------------------------------|------------|-------------|-------|
| Naïve vs. IMQ                                         | -33.57     | 2.019       | 23.51 |
| Naïve vs. RA Cream                                    | -28.3      | 2.019       | 19.82 |
| Naïve vs. IL-10 and RA Cream                          | -20.95     | 2.019       | 14.67 |
| Naïve vs. IL-10 Coacervate and RA Cream               | -8.58      | 2.019       | 6.009 |
| Naïve vs. Microneedle Treated                         | -13.07     | 2.019       | 9.156 |
| IMQ vs. RA Cream                                      | 5.265      | 2.019       | 3.687 |
| IMQ vs. IL-10 and RA Cream                            | 12.62      | 2.019       | 8.84  |
| IMQ vs. IL-10 Coacervate and RA Cream                 | 24.99      | 2.019       | 17.5  |
| IMQ vs. Microneedle Treated                           | 20.5       | 2.019       | 14.36 |
| RA Cream vs. IL-10 and RA Cream                       | 7.357      | 2.019       | 5.152 |
| RA Cream vs. IL-10 Coacervate and RA Cream            | 19.73      | 2.019       | 13.81 |
| RA Cream vs. Microneedle Treated                      | 15.23      | 2.019       | 10.67 |
| IL-10 and RA Cream vs. IL-10 Coacervate and RA Cream  | 12.37      | 2.019       | 8.662 |
| IL-10 and RA Cream vs. Microneedle Treated            | 7.875      | 2.019       | 5.516 |
| IL-10 Coacervate and RA Cream vs. Microneedle Treated | -4.493     | 2.019       | 3.147 |

  

| Group Comparison (Day 8)                              | Mean diff. | SE of diff. | q      |
|-------------------------------------------------------|------------|-------------|--------|
| Naïve vs. IMQ                                         | -59.86     | 3.588       | 23.59  |
| Naïve vs. RA Cream                                    | -56.93     | 3.588       | 22.44  |
| Naïve vs. IL-10 and RA Cream                          | -55.82     | 3.588       | 22     |
| Naïve vs. IL-10 Coacervate and RA Cream               | -41.32     | 3.588       | 16.29  |
| Naïve vs. Microneedle Treated                         | -21.53     | 3.588       | 8.486  |
| IMQ vs. RA Cream                                      | 2.929      | 3.588       | 1.154  |
| IMQ vs. IL-10 and RA Cream                            | 4.039      | 3.588       | 1.592  |
| IMQ vs. IL-10 Coacervate and RA Cream                 | 18.53      | 3.588       | 7.305  |
| IMQ vs. Microneedle Treated                           | 38.33      | 3.588       | 15.11  |
| RA Cream vs. IL-10 and RA Cream                       | 1.11       | 3.588       | 0.4377 |
| RA Cream vs. IL-10 Coacervate and RA Cream            | 15.6       | 3.588       | 6.151  |
| RA Cream vs. Microneedle Treated                      | 35.4       | 3.588       | 13.95  |
| IL-10 and RA Cream vs. IL-10 Coacervate and RA Cream  | 14.49      | 3.588       | 5.713  |
| IL-10 and RA Cream vs. Microneedle Treated            | 34.29      | 3.588       | 13.52  |
| IL-10 Coacervate and RA Cream vs. Microneedle Treated | 19.8       | 3.588       | 7.803  |

Supplementary Table 1: Tukey test results from epidermal thickness measurements (n=30). Measurements processed using GraphPad Prism.

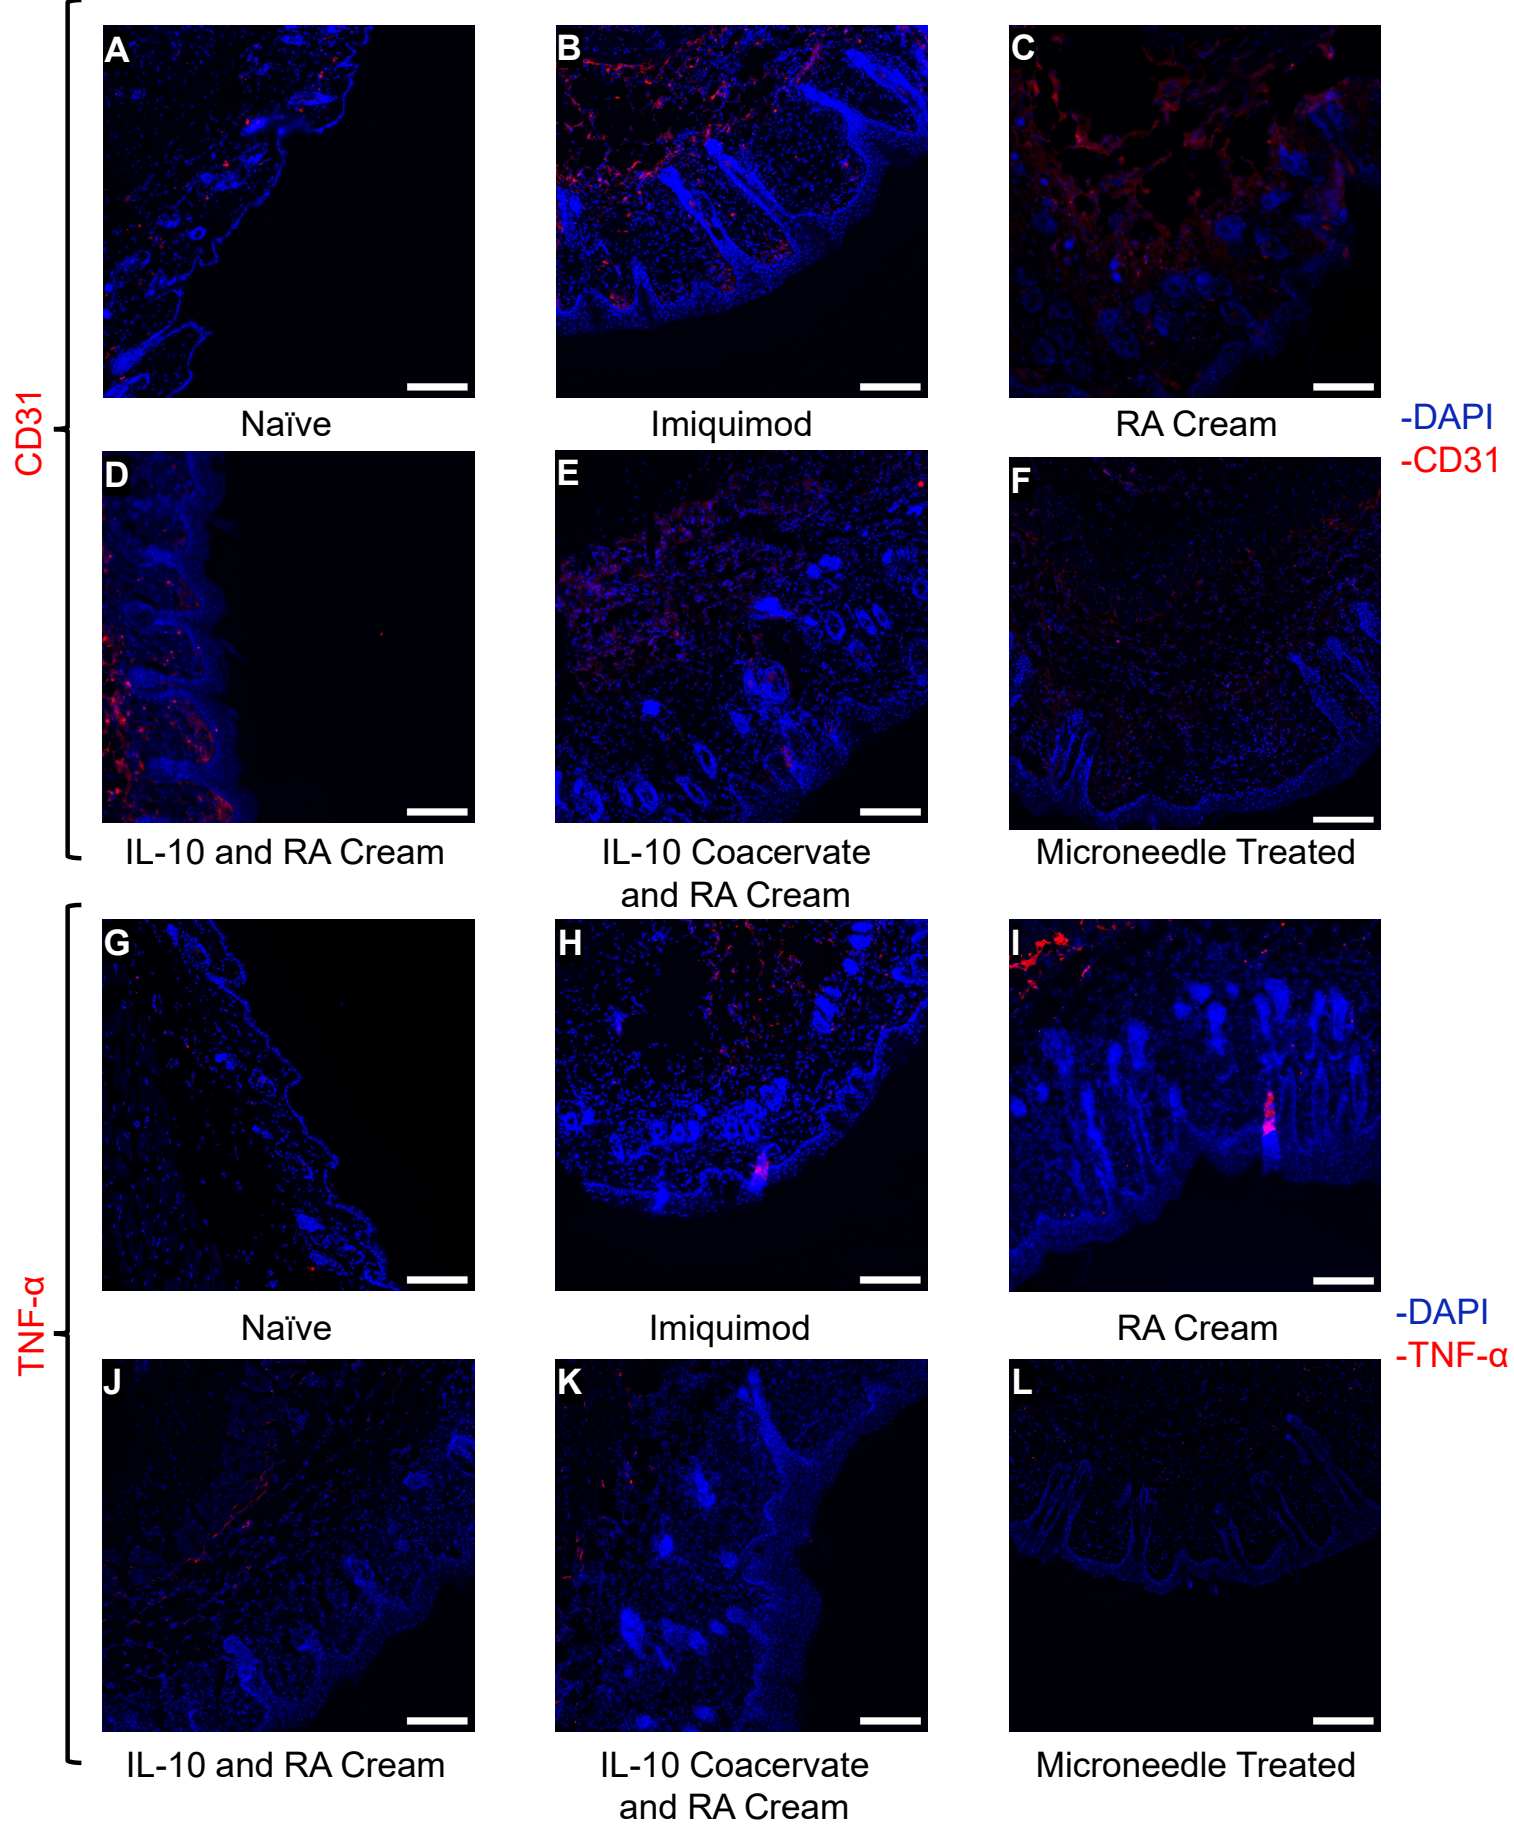

Supplementary Figure 1: Immunofluorescence staining of mouse skin on day 8. A-F) CD31 and G-L) TNF- $\alpha$  stained skin tissue samples. All skin samples were stained with DAPI to label nuclei of cells. Scale Bar: 100  $\mu$ m.

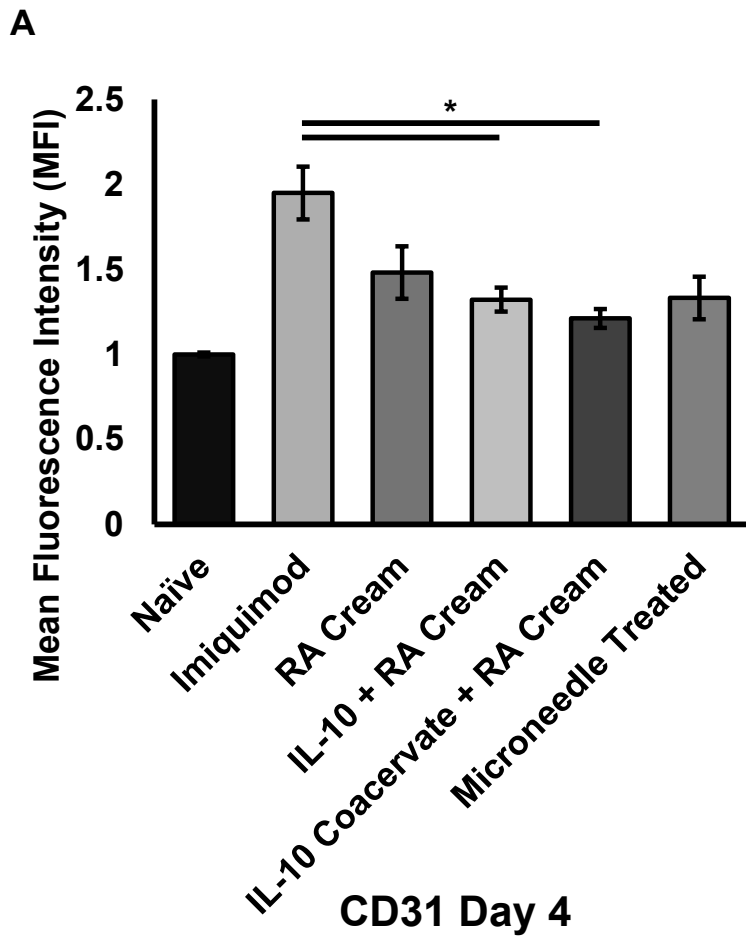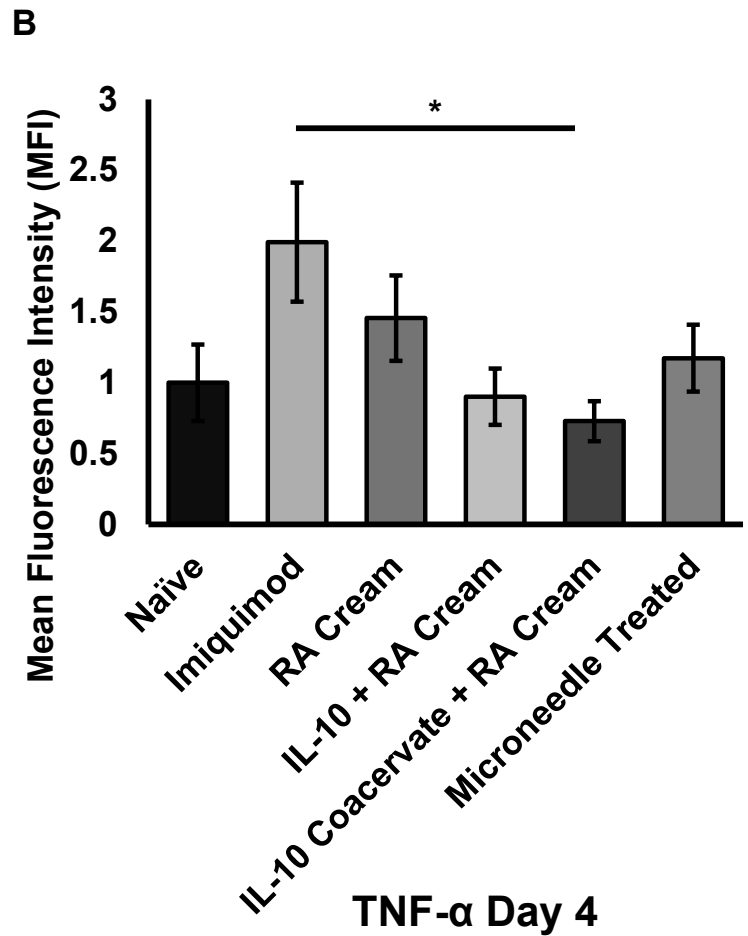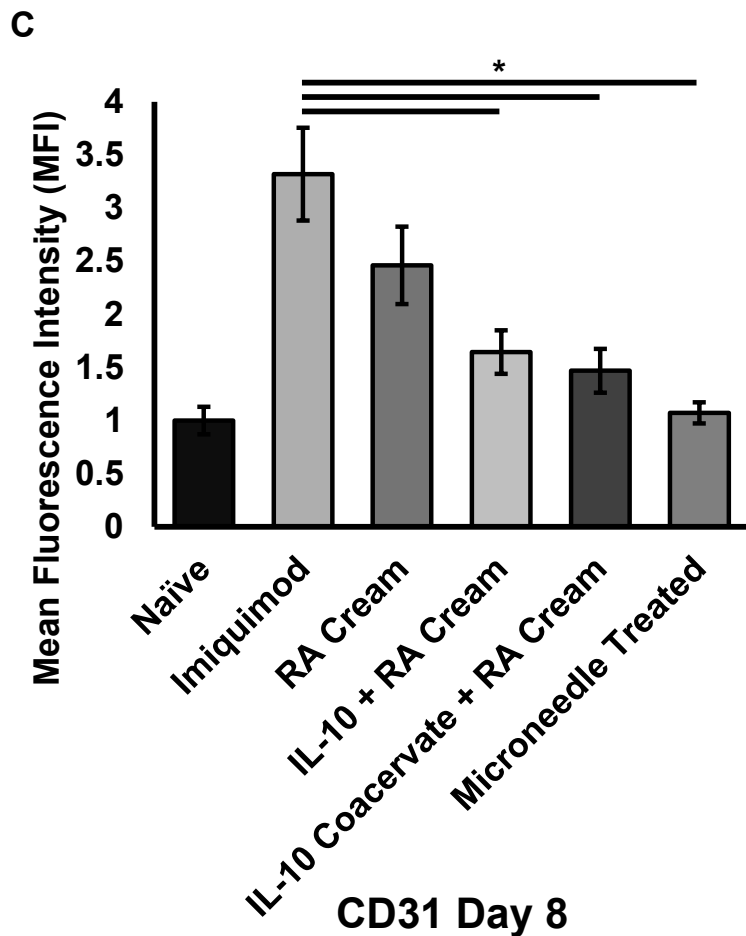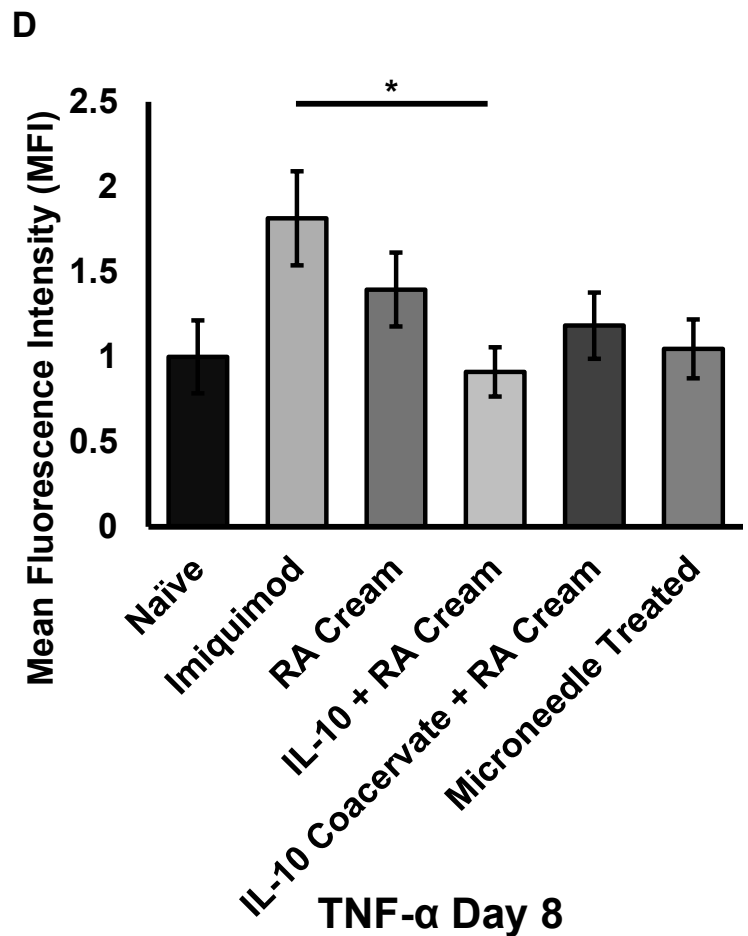

Supplementary Figure 2: Normalized MFI of immunofluorescent signal of CD31 and TNF-α on day 4 and day 8 (n=3). SEM shown.
